# Supplementary material
Source: publisher site journal article supplement (https://www.dovepress.com/article/297582)
Supplement: Supplementary file 1 [file get_supplementary_file.php]

## Supplementary file 1

### Questionnaire in English

Questionnaire code \_\_\_\_\_

#### Part I: Socio-demographic characteristics of respondents

| S no | Questions                                                         | Responses                                                                                                     |
|------|-------------------------------------------------------------------|---------------------------------------------------------------------------------------------------------------|
| 1.1  | Sex                                                               | 1. Male 2. Female                                                                                             |
| 1.2  | Age( in years)                                                    | _____ years                                                                                                   |
| 1.3  | Level of education                                                | 1. Can't read and write<br>2. Primary education(Grades 1-8)<br>3. Secondary education<br>4. College and above |
| 1.4  | Marital Status                                                    | 1. Single<br>2. Married<br>3. Divorced<br>4. Widowed                                                          |
| 1.5  | Religion                                                          | 1. Orthodox<br>2. Muslim<br>3. Protestant<br>4. Catholic<br>5. Other (specify) -----                          |
| 1.6  | Place of residence                                                | 1. Urban 2. Rural                                                                                             |
| 1.7  | Ethnicity                                                         | 1. Amhara 3. Tigray<br>2. Oromo 4. Other(Specify)-----                                                        |
| 1.8  | Diabetes related complications that affect your feeding practice? | 1. Yes 2. No                                                                                                  |
| 1.9  | Weight                                                            | -----KG                                                                                                       |
| 2.0  | Height                                                            | _____cm                                                                                                       |
|      | BMI                                                               | -----KG/M <sup>2</sup>                                                                                        |

## Part II: Dietary Adherence of diabetes patients

| S. No | Questions<br>Aimed COVID-19                                                                    | Response |           |       |
|-------|------------------------------------------------------------------------------------------------|----------|-----------|-------|
|       |                                                                                                | Always   | Sometimes | Never |
|       |                                                                                                | 0        | 1         | 2     |
| 2.1   | Do you forget to plan the meals you eat ahead?                                                 |          |           |       |
| 2.2   | Did you miss your dietary plan yesterday?                                                      |          |           |       |
| 2.3   | Over the past two weeks, were there any days when you did not take your dietary plan properly? |          |           |       |
| 2.3   | Do you sometimes forget to comply your dietary plan with everyday life?                        |          |           |       |
| 2.4   | When you feel like your DM is under control, do you sometimes stop taking your dietary plan?   |          |           |       |
| 2.5   | Do you ever feel hassled about sticking to your dietary plan?                                  |          |           |       |
| 2.6   | Did you have Feelings of dietary deprivation?                                                  |          |           |       |
| 2.7   | Do you miss to include fruits in your food daily?                                              |          |           |       |
| 2.8   | Do you miss to include vegetables in your food daily?                                          |          |           |       |
| 2.9   | Do you forget to cut down butter and fat intake in your food?                                  |          |           |       |

## Part III: Knowledge about COVID-19

| S.no. | Knowledge Questions                                                                                                                                                | Yes | No |
|-------|--------------------------------------------------------------------------------------------------------------------------------------------------------------------|-----|----|
| 3.1   | Main clinical symptom of COVID-19 is fever, cough, shortness of breath, and fatigue                                                                                |     |    |
| 3.2   | Unlike the common cold, stuffy nose, running nose, and sneezing are less common in persons infected with COVID-19 virus                                            |     |    |
| 3.3   | COVID-19 symptoms appear within 2–14 wee                                                                                                                           |     |    |
| 3.4   | Currently, there is no effective treatment or vaccine for COVID-19, but early supportive treatment can help most patients to recover from infection                |     |    |
| 3.5   | Not all persons with COVID-19 will develop severe cases. Those who are elderly, have chronic illness, and suppressed immunity are more likely to have severe cases |     |    |
| 3.6   | Touching or shaking hands of an infected person would result in being infected by COVID-19                                                                         |     |    |
| 3.7   | Touching an object or surface with the virus on it, touching your mouse, nose, or eye with unwashed hands would result in infection by COVID-19 virus              |     |    |
| 3.8   | The COVID-19 virus was spread via respiratory droplet of infected individuals                                                                                      |     |    |
| 3.9   | Persons with COVID-19 cannot spread the virus to others if they have no symptoms of COVID-19                                                                       |     |    |
| 3.10  | Wearing a mask when moving out of home is important to prevent infection with COVID-19 virus                                                                       |     |    |
| 3.11  | Children and young adults do not need to take measures to prevent the infection by COVID-19 virus                                                                  |     |    |
| 3.12  | Washing hands frequently with soap and water for at least 20 seconds or use of an alcohol based sanitizer (60%) is important to prevent infection with COVID-19    |     |    |
| 3.13  | To prevent COVID-19 infection individuals avoid going to crowded place such as public transportation, market, religious place hospital, and work place             |     |    |
| 3.14  | Traveling to an infectious area or having contact with someone who has traveled to an area where infection is present is a risk for developing infection           |     |    |
| 3.15  | solation and treatment of COVID-19 patients are effective ways to reduce the spread of the COVID-19 virus                                                          |     |    |
| 3.16  | People who have contact with someone infected with the COVID-19 virus should be immediately isolated in a proper place                                             |     |    |

#### Part IV: Respondents' Health related information

| S. no | Question                                                                        | Response     |
|-------|---------------------------------------------------------------------------------|--------------|
| 4.1   | Duration of disease? (When was the disease start or diagnosed as DM)?           | _____yrs.    |
| 4.2   | Do you have any other chronic illness that affects your feeding practice?       | 1. Yes 2. No |
| 4.3   | Diabetes related complications that affect your feeding practice?               | 1. Yes 2. No |
| 4.4   | Are you given nutrition education in the clinic/hospital( based on your status) | 1.Yes 2.No   |
| 4.5   | Are you given journals and pamphlets (about diabetes)?                          | 1.Yes 2.No   |
| 4.6   | Do you get any visual diabetic nutrition education?                             | 1. Yes 2. No |

### **Part V: Behavioral and Food related information**

| S. no | Question                                                                                                            | Response                                   |
|-------|---------------------------------------------------------------------------------------------------------------------|--------------------------------------------|
|       | Aimed COVID-19                                                                                                      |                                            |
| 5.1   | When you eat at a restaurant or in social events, do you make menu choices that will help control your blood sugar? | 1. Yes<br>2. No                            |
| 5.2   | Do you have a habit of smoking?                                                                                     | 1.Yes 2.No                                 |
| 5.3   | Do you forget to limit your alcohol intake?                                                                         | 1. Yes 2. No                               |
| 5.4   | Do you consider holidays and other days of celebrations “free days” when you can eat whatever you want?             | 1. Yes 2. No                               |
| 5.5   | Do you do physical exercise?                                                                                        | 1. Yes 2. No                               |
| 5.6   | Do you check your fasting blood glucose daily?                                                                      | 1. Yes 2. No                               |
| 5.7   | Are the meals you eat prepared in ways that help control your diabetes?                                             | 1. Yes 2. No                               |
| 5.8   | Do you have difficulty choosing foods?                                                                              | 1. Yes 2. No                               |
| 5.9   | Do you have friends/ family support?                                                                                | 1.Yes 2. No                                |
| 5.10  | Do you have enough information about food planning to control your DM?                                              | 1.Yes 2. No                                |
| 5.12  | Do you think the availability of fruits and vegetables is enough?                                                   | 1.Yes 2.No                                 |
| 5.13  | Is there shortage of food supply related to the pandemic?                                                           | 1.Yes 2.No                                 |
| 5.14  | How many servings of fruits and vegetables do you think you have to eat on daily bases?                             | 1. Once<br>2. 2-4 times<br>3. I don't know |

|      |                                                                                   |                                                                                                         |
|------|-----------------------------------------------------------------------------------|---------------------------------------------------------------------------------------------------------|
| 5.15 | Which fat do experts say is most important for people to cut down on?             | 1. Liquid oils<br>2. Fats and butter<br>3. Not sure                                                     |
| 5.16 | According to the food pyramid Which foods do you think you have to cut down a lot | 1. Fruits and vegetables<br>2. Carbohydrates<br>3. Milk and milk products<br>4. Sweets<br>5. Don't know |
| 5.17 | Which one is healthy                                                              | 1.Butter<br>2.Olive oil<br>3.Don't know                                                                 |
| 5.18 | How many regular meals do you think you have to eat daily                         | 1. One meal<br>2. Two meals<br>3. Three meals<br>4. .Don't know                                         |
| 5.19 | How many Snacks do you think you have to eat daily                                | 1. One snack<br>2. Three Snacks<br>3. Two snacks<br>5. Don't know                                       |

### Part V: Socio-economic status of respondents

| S. no | Questions                                    | Response                                                                                                                                                                                                                                            |
|-------|----------------------------------------------|-----------------------------------------------------------------------------------------------------------------------------------------------------------------------------------------------------------------------------------------------------|
| 2.1   | Occupation?                                  | 1. Farmer<br>2. House wife<br>3. Government employee<br>4. Merchant<br>5. Pension<br>6. Daily laborer<br>7. Other(Specify)_____                                                                                                                     |
| 2.2   | Monthly income?                              | _____ETH. Birr                                                                                                                                                                                                                                      |
| 2.3   | Family size?(write number)                   | 1. Female-----<br>2. Male-----<br>3. Total-----                                                                                                                                                                                                     |
| 2.4   | Which one do you use for cooking?            | 1. Electricity<br>2. Gasoline<br>3. Charcoal<br>4. Animal Dung/Wood<br>5. Cylinder(Oxygen gas)                                                                                                                                                      |
| 2.5   | Which one do you use for travelling?         | 1. Private car<br>2. Public bus<br>3. Taxi<br>4. Walk<br>5. Other(specify)-----                                                                                                                                                                     |
| 2.6   | Which one of this do you have in your house? | 1. Television      1.Yes 2. No<br>2. Radio            1.Yes 2. No<br>3. Refrigerator    1.Yes 2. No<br>4. Car                1.Yes 2. No<br>5. Electric Stove   1.Yes 2. No<br>6. Table             1.Yes 2. No<br>7. Chair             1.Yes 2. No |

|        |                                    |                                                                                                                                                                                                                    |
|--------|------------------------------------|--------------------------------------------------------------------------------------------------------------------------------------------------------------------------------------------------------------------|
|        |                                    | 8. Bed 1.Yes 2. No<br>9. Cotton matters 1.Yes 2. No<br>10. Foam mattress 1.Yes 2. No<br>11. Gas light 1.Yes 2. No<br>12. Electric light 1.Yes 2. No<br>13. Mobile phone 1.Yes 2. No<br>14. Fixed phone 1.Yes 2. No |
| 2.7    | The house you are living is?       | 1. Private 1. Yes 2. No<br>2. Government 1. Yes 2. No<br>3. Rent 1.Yes 2. No<br>4. Other(Specify)_____                                                                                                             |
| 2.8    | The number of rooms of your house? | _____rooms                                                                                                                                                                                                         |
| 2.9    | The material your house is built?  | 1.Wall_____<br>2.Roof_____<br>3.Floor_____                                                                                                                                                                         |
| 2.10   | Do you have agricultural land?     | 1. Yes 2. No                                                                                                                                                                                                       |
| 2.10.1 | If yes                             | -----                                                                                                                                                                                                              |
| 2.11   | Do you have farm animals?          | 1. Yes<br>2. No                                                                                                                                                                                                    |
| 2.11.1 | If yes, how many?                  | 1. Cow_____<br>2. Oxen_____<br>3. Chicken_____<br>4. Goats_____<br>5. Sheep_____<br>6. Horse_____<br>7. Donkey_____<br>8. Mule_____<br>9. Other(specify)_____                                                      |
