# Supplementary material
Source: publisher site journal article supplement (https://www.dovepress.com/article/297582)
Supplement: Supplementary file 2 [file get_supplementary_file.php]

Supplementary file 2

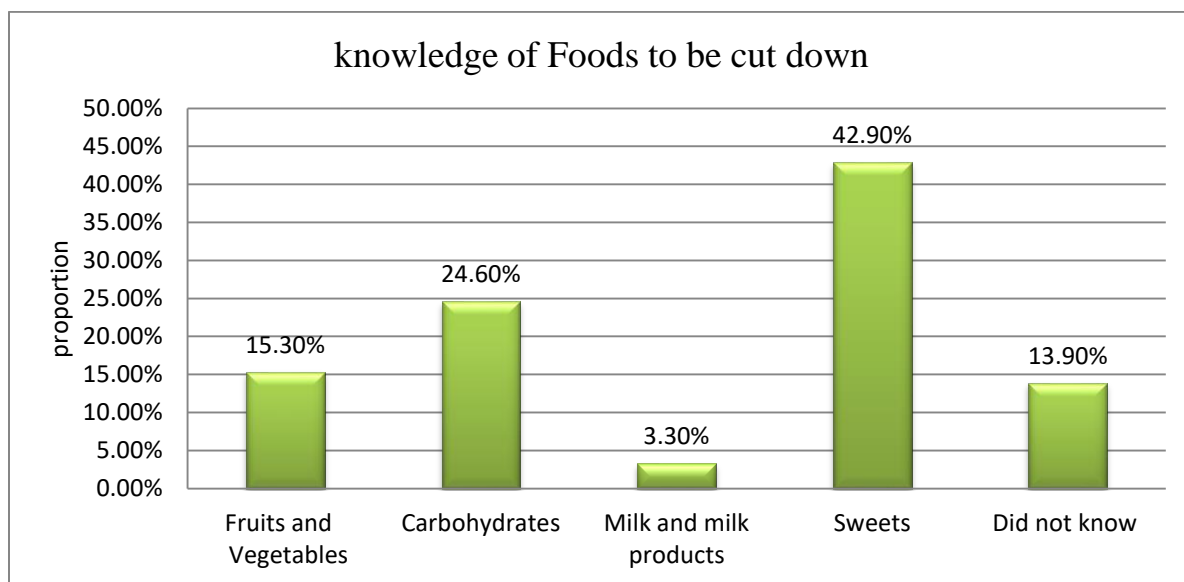

Figure S 1: Frequency distribution of participants' response about the foods to be cut down
